# Supplementary material for: N,N-Diethyl-diaminopropane-copper(ii) oxalate self-reducible complex for the solution-based synthesis of copper nanocrystals
Source: Royal Society of Chemistry journal article supplement (doi:10.1039/c7dt02510f), 2017-01-01
Supplement: c7dt02510f1.pdf [file c7dt02510f1.pdf]

## Supporting information

### **N,N-diethyl-diaminopropane-Copper(II) Oxalate Self-Reducible Complex for the Solution-Based Synthesis of Copper Nanocrystals**

Takanari Togashi,<sup>a</sup> Masato Nakayama,<sup>a</sup> Ryosuke Miyake,<sup>b</sup> Keirei Uruma,<sup>a</sup> Katsuhiko Kanaizuka,<sup>a</sup> and Masato Kurihara<sup>a</sup>

*a, Department of Science, Faculty of Science, Yamagata University, 1-4-12 Kojirakawa-machi,*

*Yamagata 990-8560*

*b, Department of Chemistry, Graduate School of Humanities and Sciences, Ochanomizu University,*

*2-1-1 Otsuka, Tokyo 112-8610*

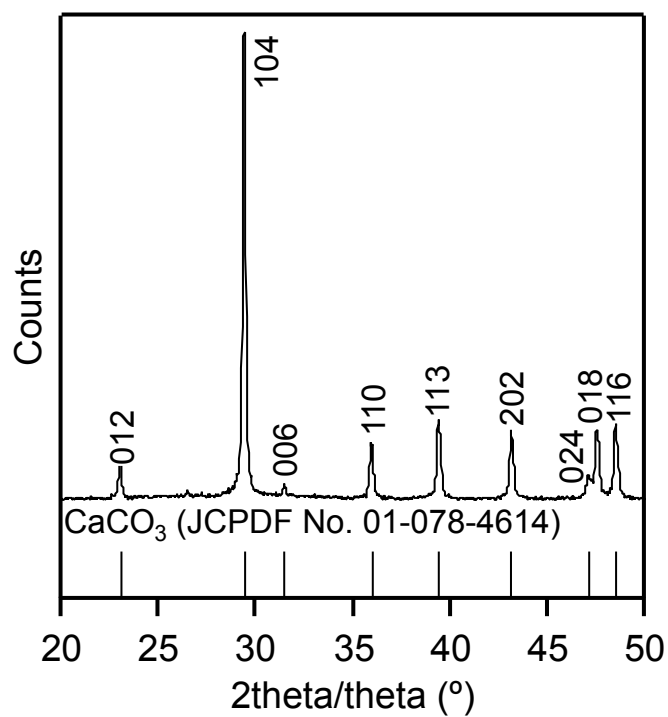

**Figure S1.** XRD pattern of the white precipitate obtained from saturated Ca(OH)<sub>2</sub> after through the gas evolved during the thermal decomposition of [Cu(ox)(dedap)<sub>2</sub>] under Ar flow.
